# Supplementary material for: Long term administration of loquat leaves and their major component, ursolic acid, attenuated endogenous amyloid-β burden and memory impairment
Source: Research Square preprint supplement (doi:10.21203/rs.3.rs-2788566/v1), 2023-04-28
Supplement: Supplementary file 1 [file 83f64aa298985811d63541d2.pdf]

**sAPP $\alpha$**

Control  
Loquat leaves

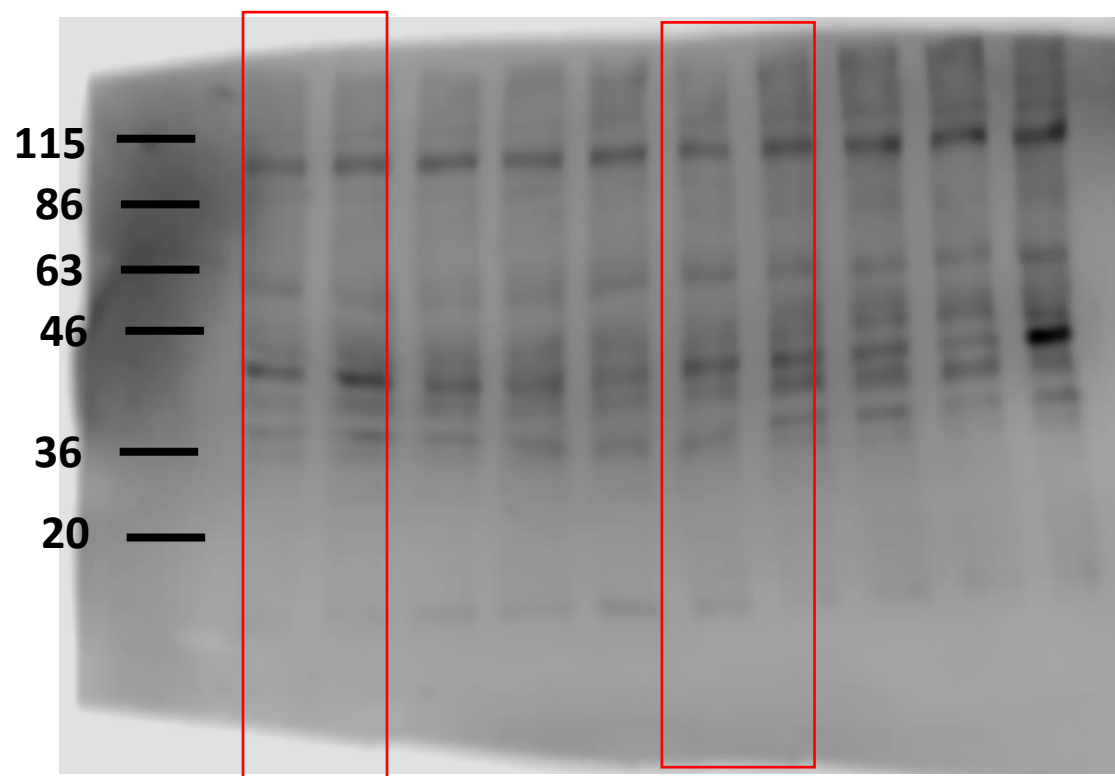

**sAPP $\beta$**

Control  
Loquat leaves

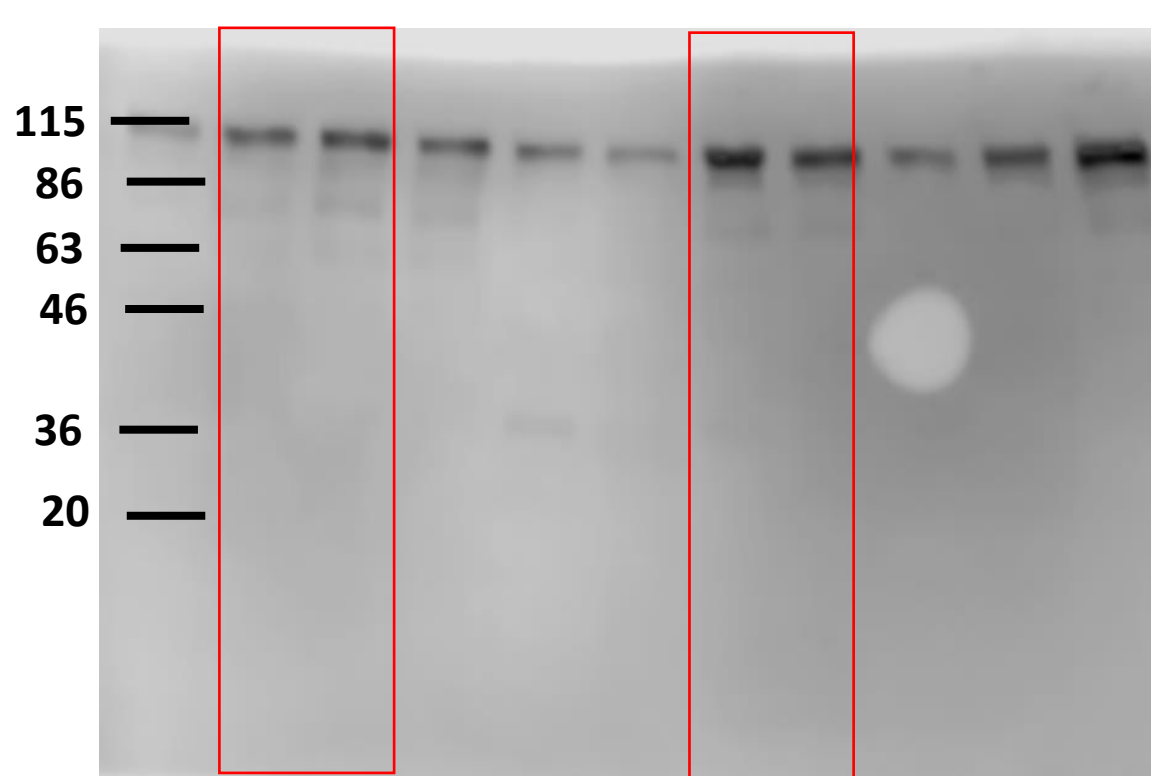

**Total tau**

Control  
Loquat leaves

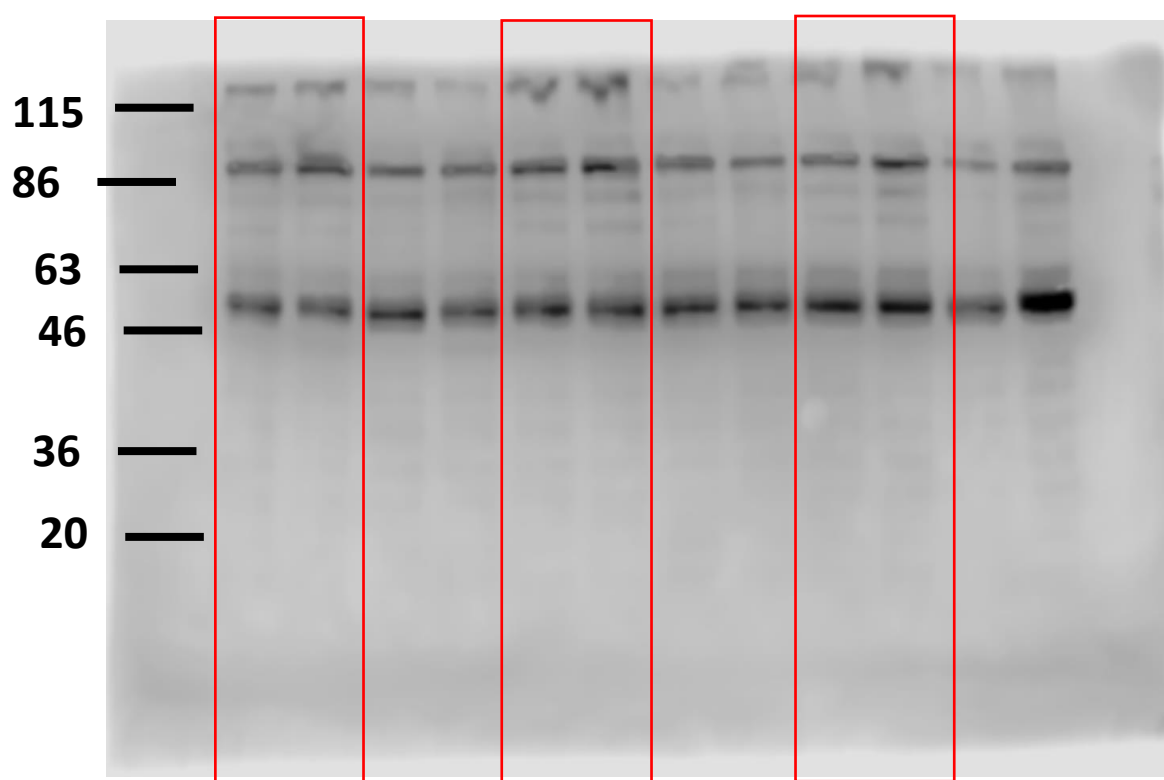

**P-tau**

Control  
Loquat leaves

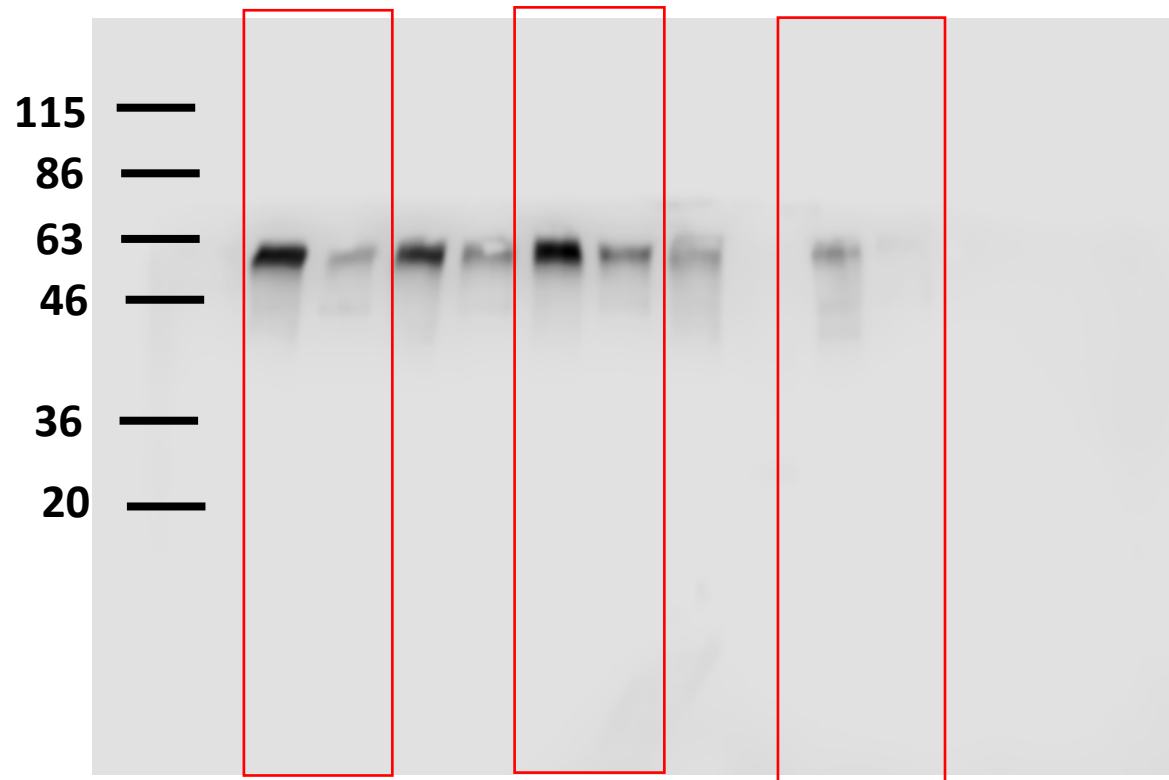

**P-Creb**

Control  
Loquat leaves

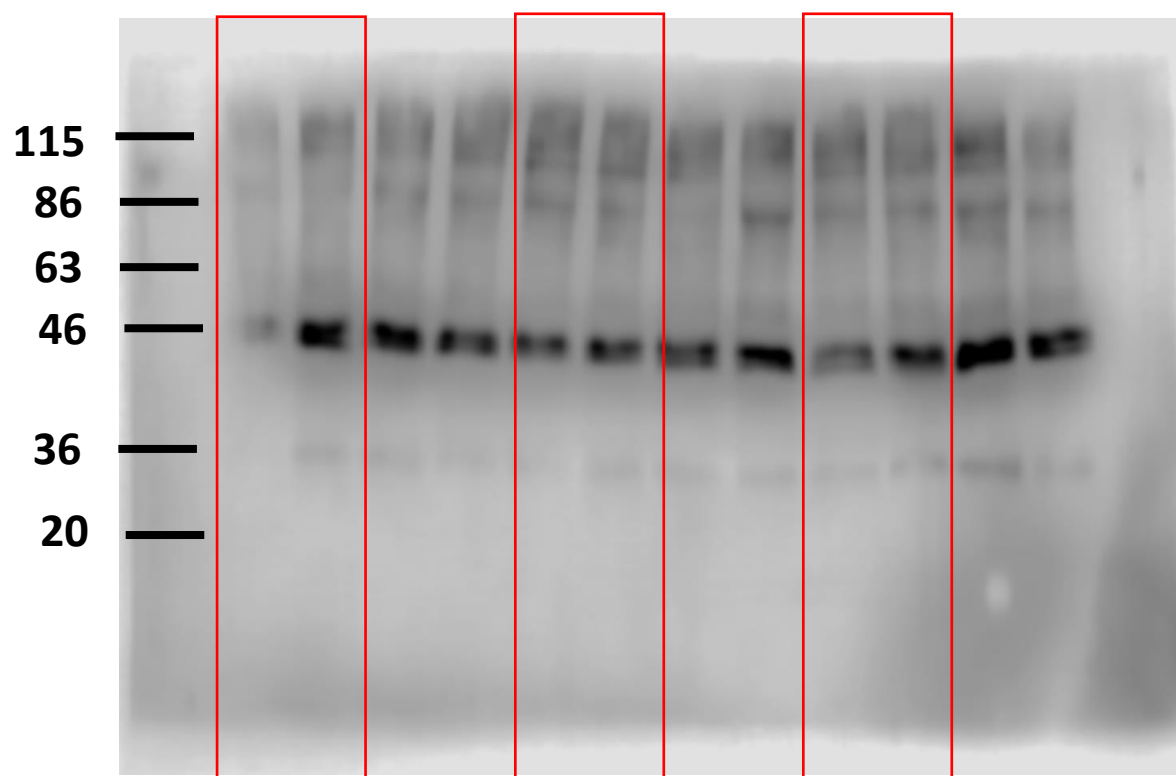

**BDNF**

Control  
Loquat leaves

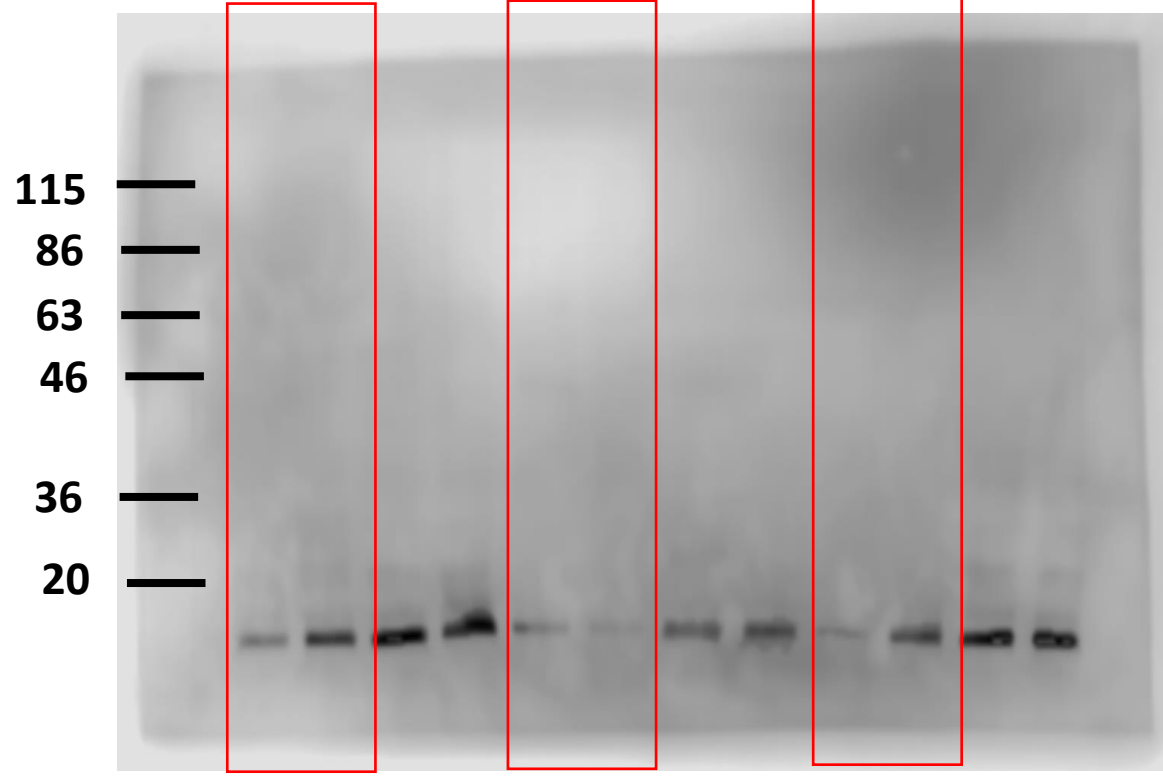

**Supplemental materials S1**

Full length of image of western blotting for Figure 2A.

**sAPP $\alpha$**

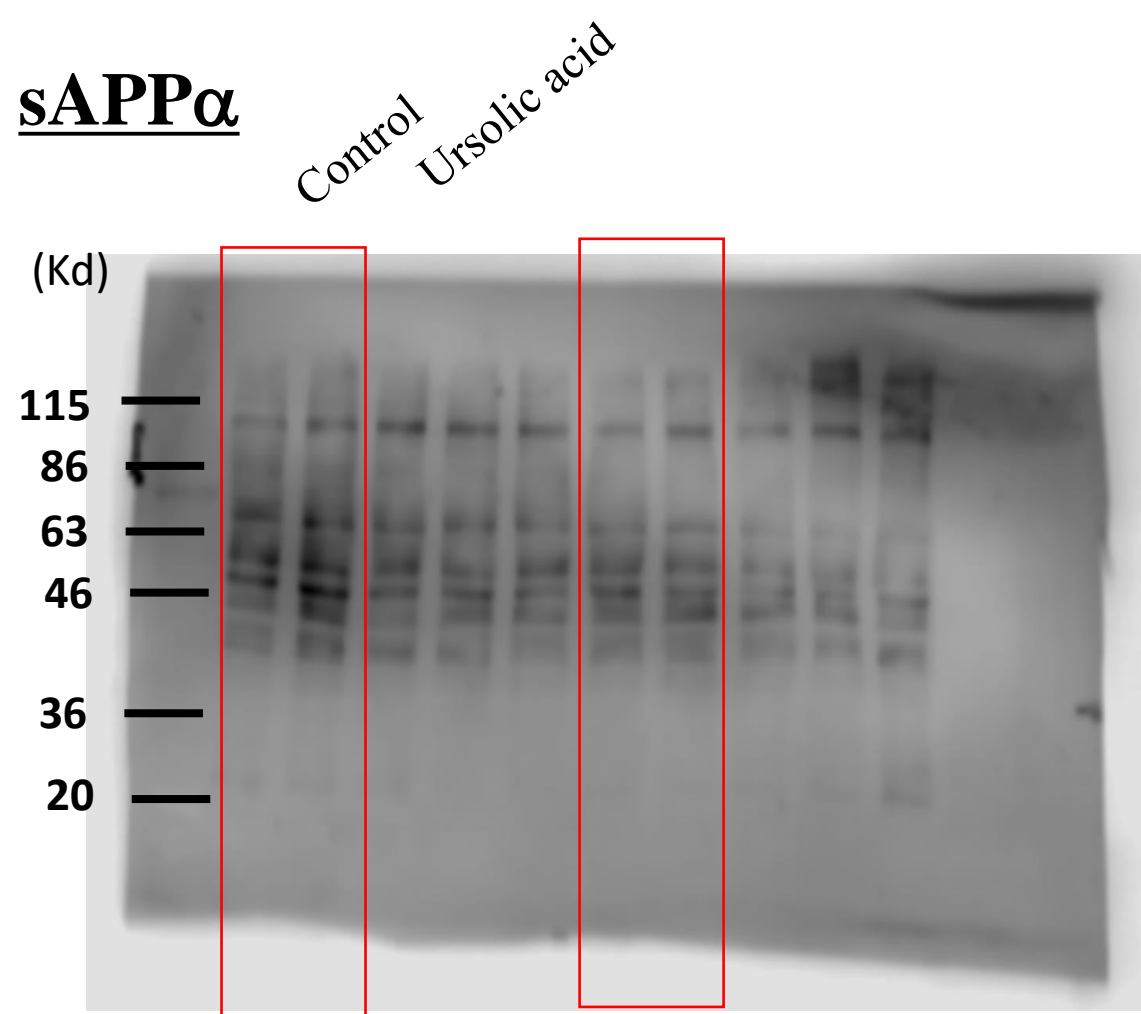

**sAPP $\beta$**

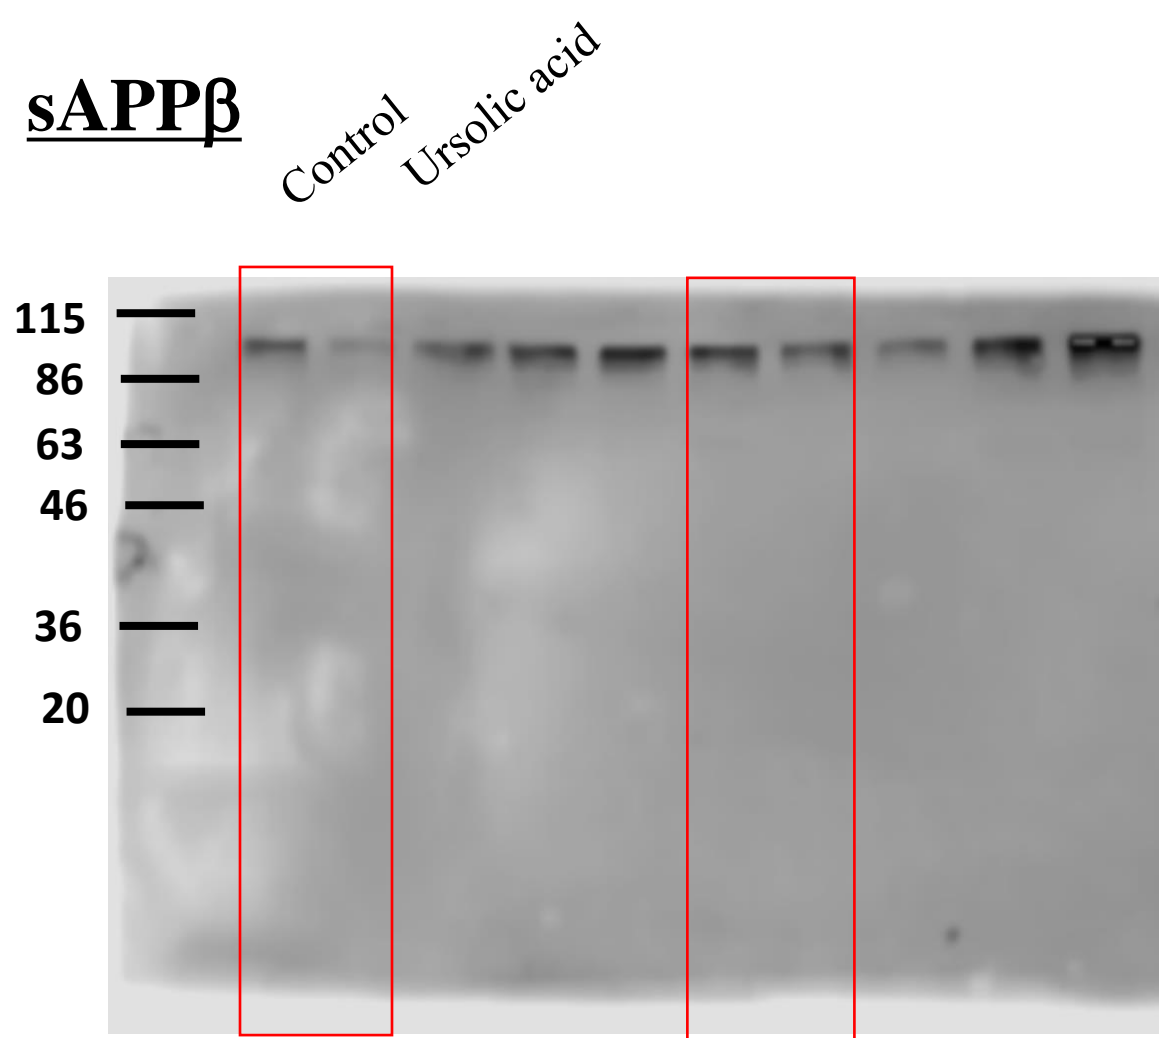

**Total tau**

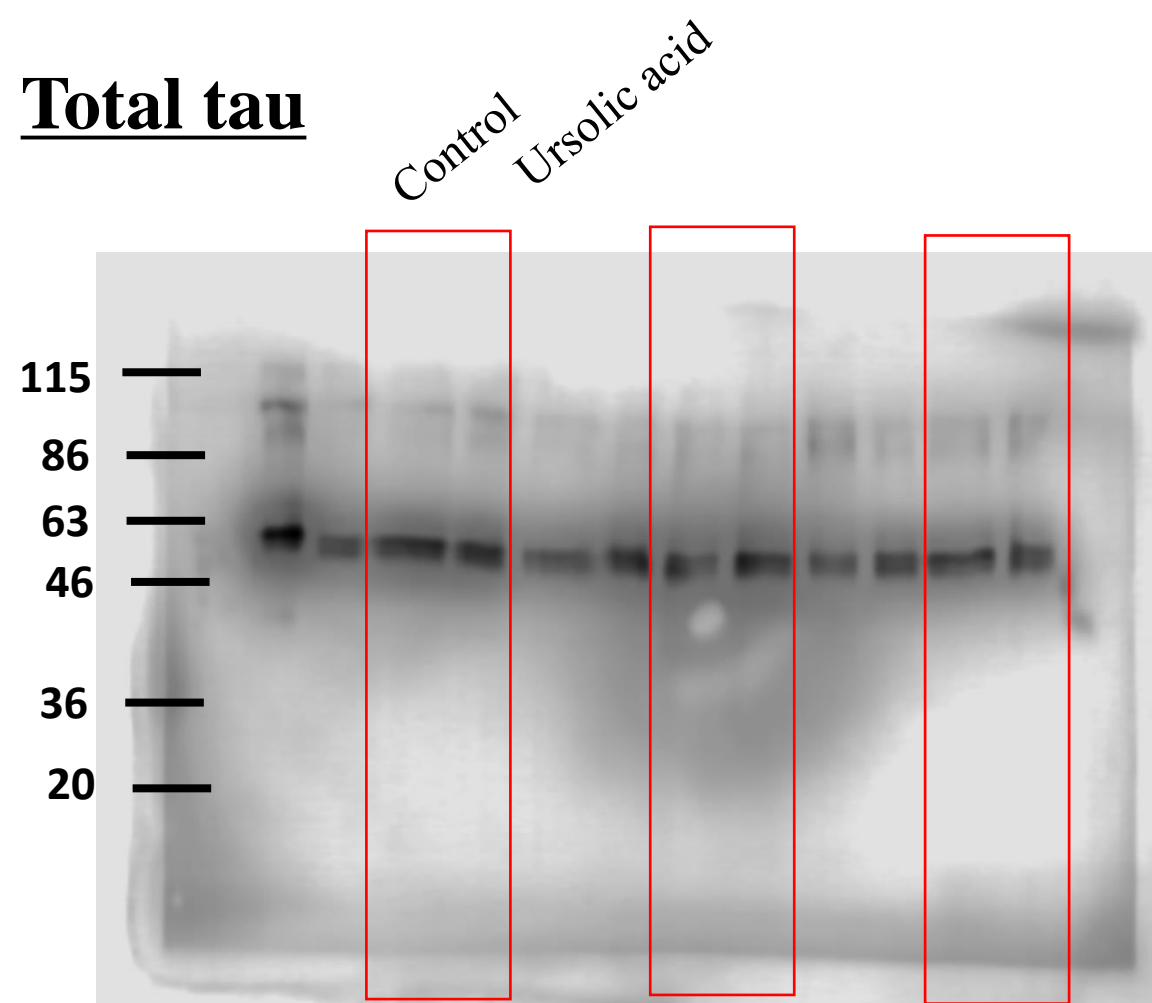

**P-tau**

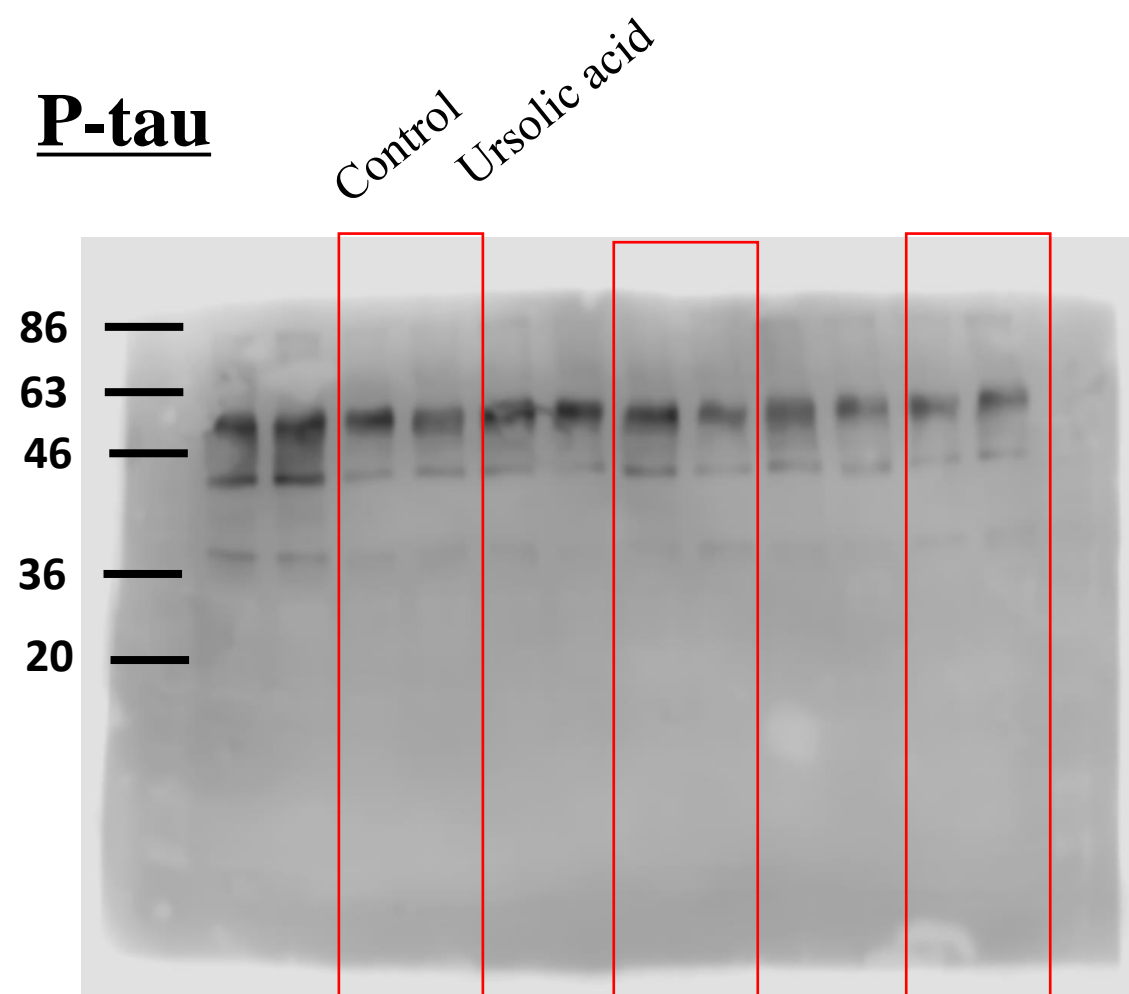

**P-Creb**

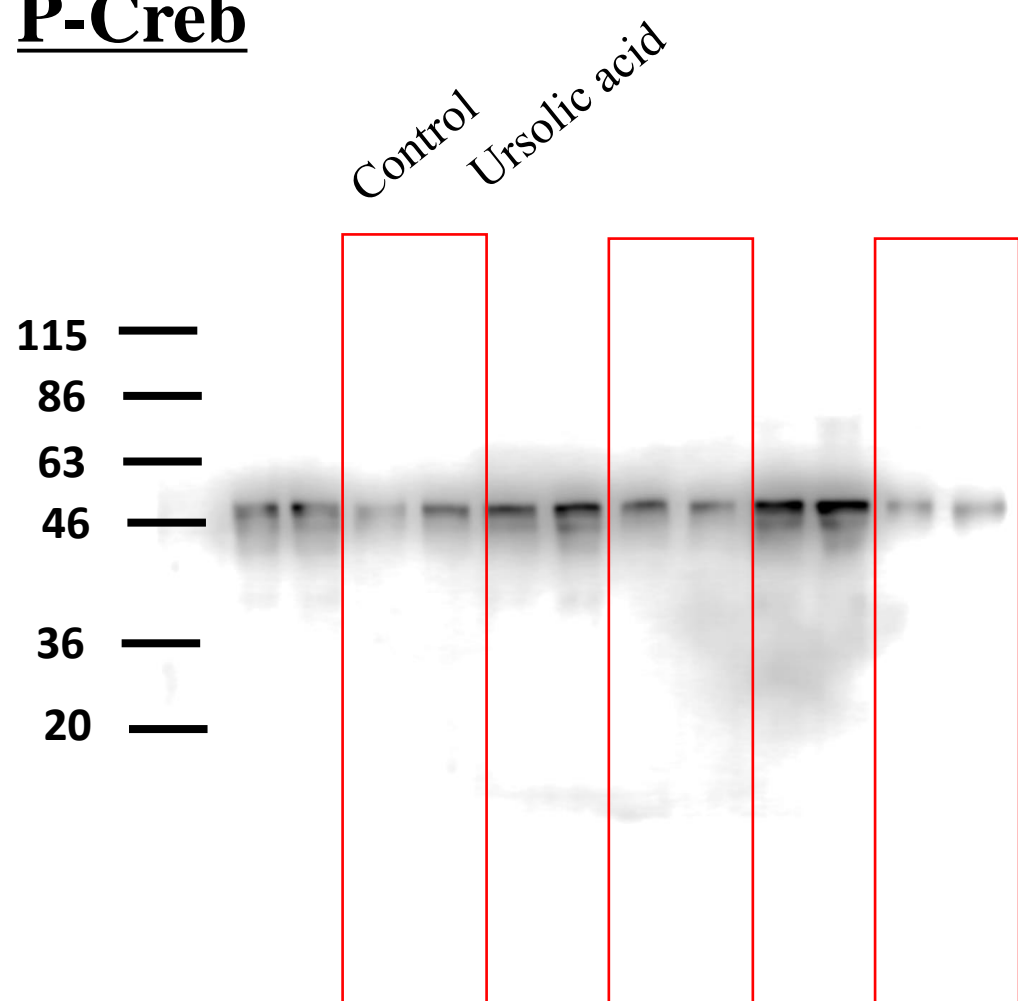

**BDNF**

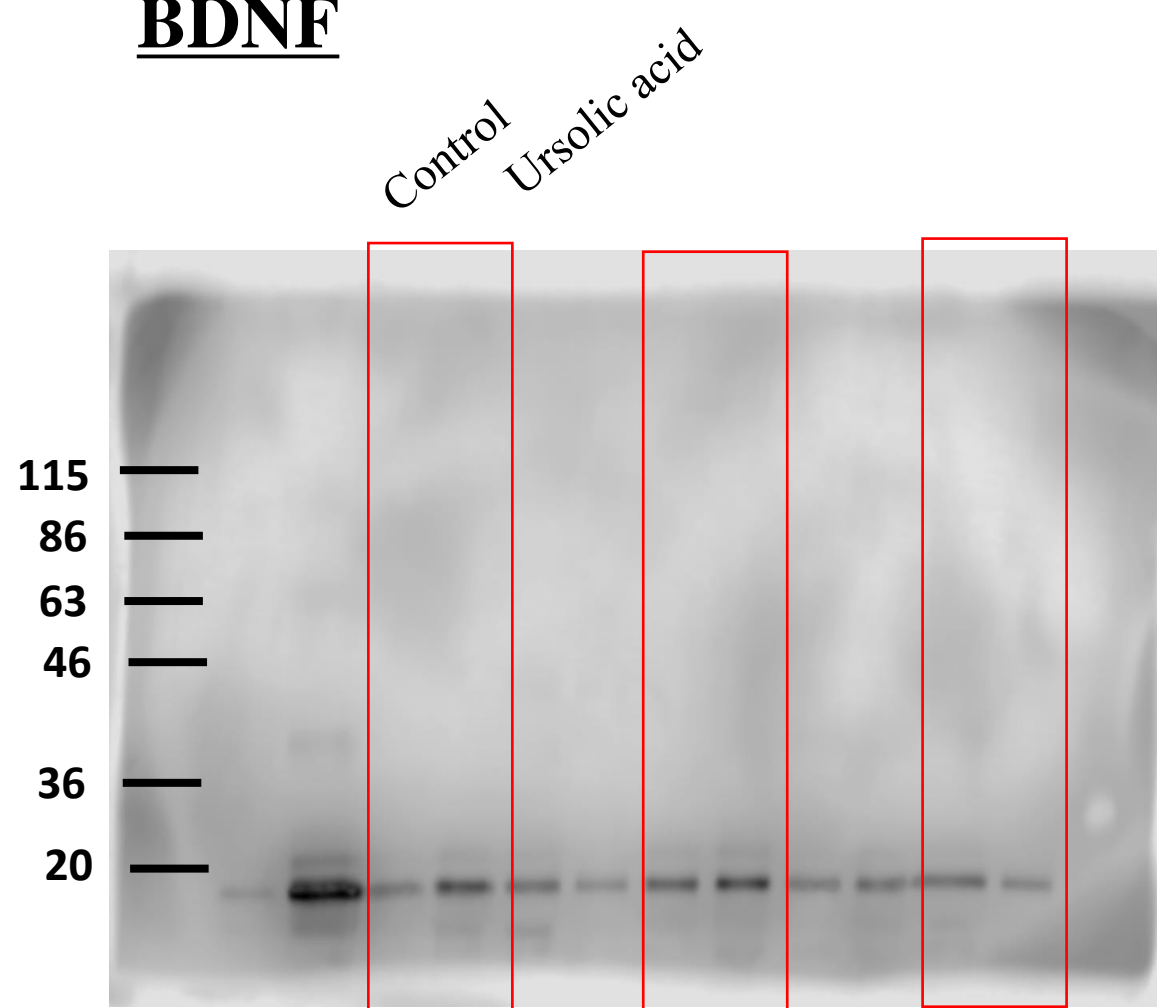

**Supplemental materials S2**

Full length of image of western blotting for Figure 4A.
